# Supplementary material for: One-pot green synthesis of nitrogen-doped carbon nanoparticles as fluorescent probes for mercury ions
Source: Royal Society of Chemistry journal article supplement (doi:10.1039/c3ra43452d), 2013-01-01
Supplement: c3ra43452d.pdf [file c3ra43452d.pdf]

# One-pot green synthesis of nitrogen-doped carbon nanoparticles as fluorescent probes for mercury ions

Hong Huang,<sup>a</sup> Jing-Jing Lv,<sup>a</sup> Dan-Ling Zhou,<sup>a</sup> Ning Bao,<sup>b</sup> Yue Xu,<sup>a</sup> Ai-Jun Wang,<sup>a\*</sup> Jiu-Ju Feng<sup>a\*</sup>

<sup>a</sup> College of Geography and Environmental Science, College of Chemistry and Life Science, Zhejiang Normal University, Jinhua 321004, China

<sup>b</sup> School of Public Health, Nantong University, Nantong 226019, China

\*Corresponding author: Ai-Jun Wang, E-mail: [ajwang@zjnu.cn](mailto:ajwang@zjnu.cn); Jiu-Ju Feng, E-mail: [jjfeng@zjnu.cn](mailto:jjfeng@zjnu.cn), Tel. /Fax: +86 579 82282269.

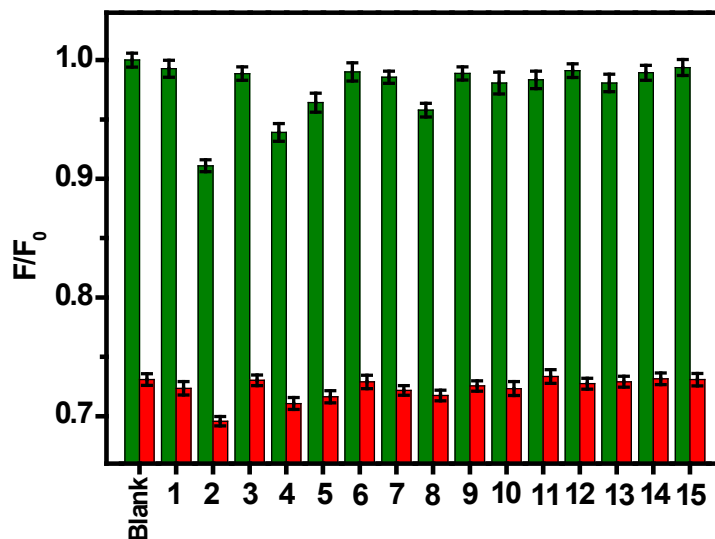

**Fig. S1** Fluorescence responses of the FNCPs in the presence of 50  $\mu\text{M}$   $\text{Hg}^{2+}$  and excess amount (100  $\mu\text{M}$ ) of 15 different metal ions in phosphate buffer solutions (From 1 to 15, the metal ion is  $\text{Ca}^{2+}$ ,  $\text{Cu}^{2+}$ ,  $\text{Ba}^{2+}$ ,  $\text{Fe}^{3+}$ ,  $\text{Pb}^{2+}$ ,  $\text{Zn}^{2+}$ ,  $\text{Ag}^{+}$ ,  $\text{Fe}^{2+}$ ,  $\text{Ni}^{2+}$ ,  $\text{Co}^{2+}$ ,  $\text{Mg}^{2+}$ ,  $\text{Mn}^{2+}$ ,  $\text{Cd}^{2+}$ ,  $\text{Cr}^{3+}$ , and  $\text{Al}^{3+}$ , respectively).

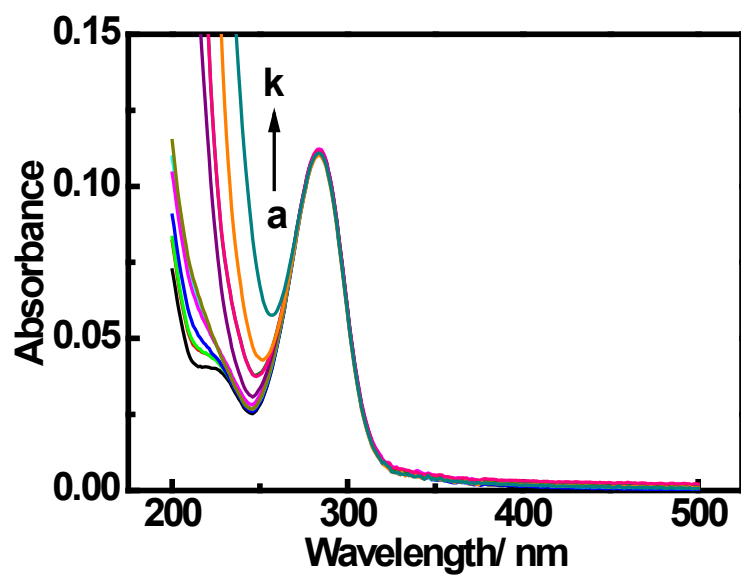

**Fig. S2** UV-Vis absorption spectra of the FNCPs in the phosphate buffer solution (25 mM, pH = 7.4) in the presence of various concentration of Hg<sup>2+</sup> (a to k: 0, 0.010, 0.025, 0.050, 0.100, 0.500, 1.00, 5.00, 10.0, 25.0, and 50.0 μM).

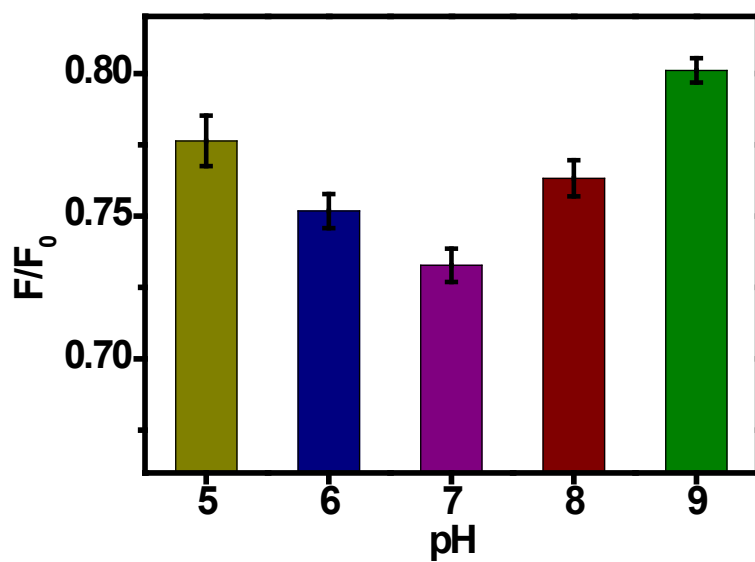

**Fig. S3** Fluorescence responses of the FNCPs at different pH values in the presence of 50 μM Hg<sup>2+</sup>.

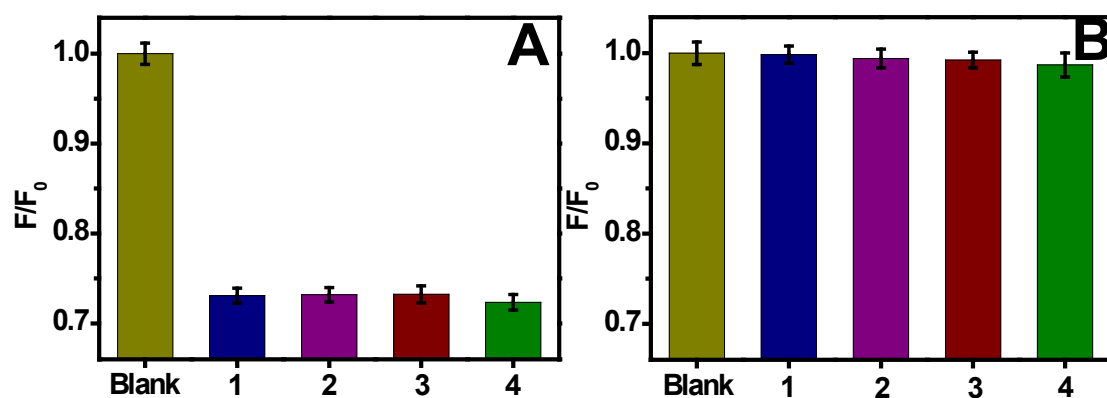

**Fig. S4** Fluorescence responses of the FNCPs in the presence of different mercury salts (A) and sodium salts (B) in phosphate buffer solutions (25 mM, pH = 7.4). The concentrations of all the metal ions are 50  $\mu$ M. 1, 2, 3 and 4 correspond to the chloride, nitrate, acetate and perchlorate salts of mercury (A) and sodium (B), respectively.

**Table S1** Comparison of the performances of different fluorescent methods for the determination of Hg<sup>2+</sup>.

| Fluorescence methods        | Linear range (nM)        | LOD (nM) | Ref.      |
|-----------------------------|--------------------------|----------|-----------|
| Single-labeled DNA          | 4-100                    | 4.0      | 1         |
| BSA-Au NPs                  | 400-43200                | 80       | 2         |
| Lysozyme-Ag NPs             | 1000-15000               | 600      | 3         |
| Glutathione-capped CdS      | 15-12500                 | 4.5      | 4         |
| CdTe quantum dots           | 8-2000                   | 2.7      | 5         |
| Au-NP-CdTe<br>nanocomposite | 131-710                  | 9        | 6         |
| FNCPs                       | 10-100 and<br>1000-50000 | 3        | This work |

**Table S2** Determination of Hg<sup>2+</sup> in the real water samples by this method.

| Samples      | Spiked amount<br>(nM) | Found amount<br>(nM) | Recovery (%) |
|--------------|-----------------------|----------------------|--------------|
| Lake water 1 | 0                     | Not detected         | ---          |
| Lake water 2 | 50                    | 48.7 ± 3.4           | 97.4 ± 6.8   |
| Lake water 3 | 100                   | 98.2 ± 2.8           | 98.2 ± 5.6   |
| Lake water 4 | 1000                  | 1065.3 ± 91          | 106.5 ± 9.1  |

## Reference

- 1 X. Yang, Y. Zhu, P. Liu, L. He, Q. Li, Q. Wang, K. Wang, J. Huang and J. Liu, *Anal. Methods*, 2012, **4**, 895.
- 2 D. Hu, Z. Sheng, P. Gong, P. Zhang and L. Cai, *Analyst*, 2010, **135**, 1411.
- 3 T. Zhou, Y. Huang, Z. Cai, F. Luo, C. J. Yang and X. Chen, *Nanoscale*, 2012, **4**, 5312.
- 4 A. N. Liang, L. Wang, H.-Q. Chen, B.-B. Qian, B. Ling and J. Fu, *Talanta*, 2010, **81**, 438.
- 5 J. Duan, L. Song and J. Zhan, *Nano Res.*, 2009, **2**, 61.
- 6 B. Paramanik, S. Bhattacharyya and A. Patra, *Chem. Eur. J.*, 2013, **19**, 5980.
